# Supplementary material for: Antigen recognition detains CD8+ T cells at the blood-brain barrier and contributes to its breakdown
Source: Springer Nature journal article supplement (doi:10.1038/s41467-023-38703-2), 2023-05-30
Supplement: MOESM1 [file 41467_2023_38703_MOESM1_ESM.pdf]

## Antigen-recognition detains CD8<sup>+</sup> T cells at the blood-brain barrier and contributes to its breakdown

*Sidar Aydin<sup>1&</sup>, Javier Pareja<sup>1&</sup>, Vivianne M. Schallenberg<sup>1</sup>, Armelle Klopstein<sup>1</sup>, Thomas Gruber<sup>2</sup>, Nicolas Page<sup>3</sup>,  
Elisa Bouillet<sup>1</sup>, Nicolas Blanchard<sup>4</sup>, Roland Liblau<sup>4</sup>, Jakob Körbelin<sup>5</sup>, Markus Schwaninger<sup>6</sup>, Aaron J. Johnson<sup>7</sup>,  
Mirjam Schenk<sup>2</sup>, Urban Deutsch<sup>1</sup>, Doron Merkler<sup>3</sup>, Britta Engelhardt<sup>1\*</sup>*

<sup>1</sup>Theodor Kocher Institute, University of Bern, Bern, Switzerland

<sup>2</sup>Institute of Pathology, Experimental Pathology, University of Bern, Bern, Switzerland

<sup>3</sup>Department of Pathology and Immunology, Division of Clinical Pathology, University and University Hospitals of Geneva, Geneva, Switzerland

<sup>4</sup>Toulouse Institute for infectious and inflammatory diseases, University of Toulouse, CNRS, INSERM, UPS, Toulouse, France

<sup>5</sup>Department of Oncology, Hematology and Bone Marrow Transplantation, University Medical Center Hamburg-Eppendorf, Hamburg, Germany

<sup>6</sup>Institute for Experimental and Clinical Pharmacology and Toxicology, Center of Brain, Behavior and Metabolism, University of Lübeck, Lübeck, Germany

<sup>7</sup>Mayo Clinic Graduate School of Biomedical Sciences, College of Medicine, Mayo Clinic, Rochester, MN, USA

& Contributed equally

### **\*Corresponding author:**

Britta Engelhardt

E-Mail: [britta.engelhardt@tki.unibe.ch](mailto:britta.engelhardt@tki.unibe.ch)

ORCID:[orcid.org/0000-0003-3059-9846](https://orcid.org/0000-0003-3059-9846)

## Supplementary Information

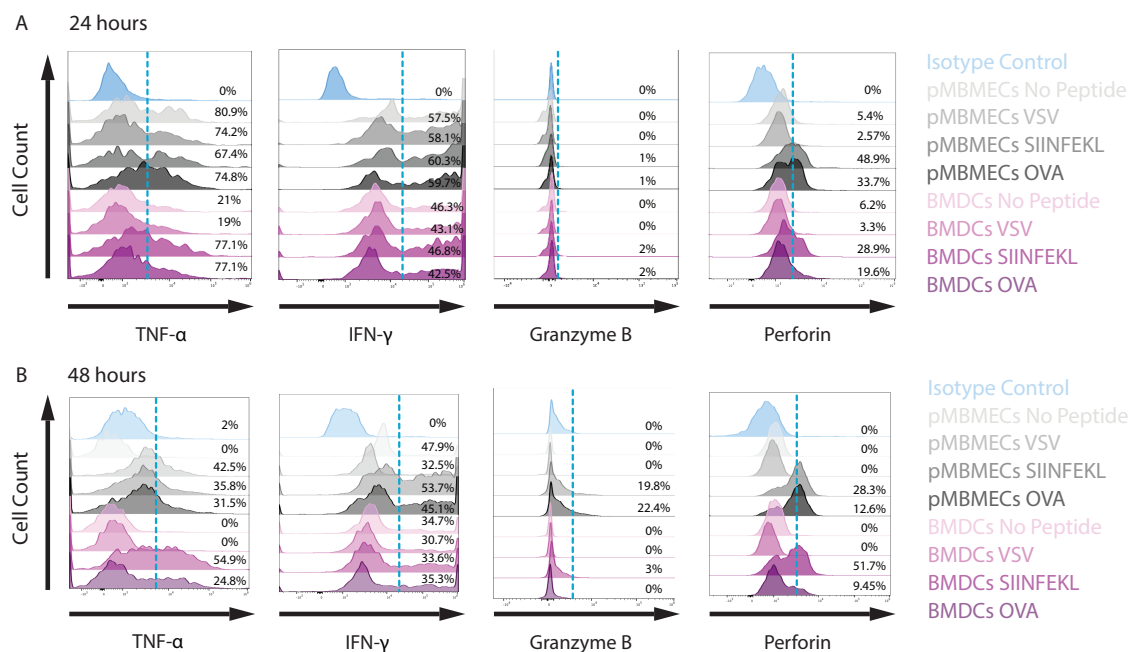

### Supplementary Figure 1. Phenotype of OT-I cells upon-co-culture with WT pMBMECs

**(A-B)** Flow cytometry analysis of naïve OT-I cells after 24 **(A)** and 48 hours **(B)** hours of co-culture with TNF- $\alpha$ /IFN- $\gamma$  stimulated WT pMBMECs in the absence of antigen, or in the presence of VSV- or SIINFEKL peptide or full-length ovalbumin (OVA) protein. Histograms show cell immunostaining of CD3<sup>+</sup>CD8<sup>+</sup> OT-I cells for the cytotoxicity related molecules granzyme B, perforin and the cytokines TNF- $\alpha$  and IFN- $\gamma$ . Isotype control for each marker in each condition is shown at the top of each plot. Percentage of events above the dashed blue threshold is indicated. The data is representative of 1 individual experiment. Gating strategy for OT-I cells is shown in Supplementary Figure 2. Source data are provided as a Source Data file.

OT-I T cells after co-incubation with WT pMBMECs (72h)

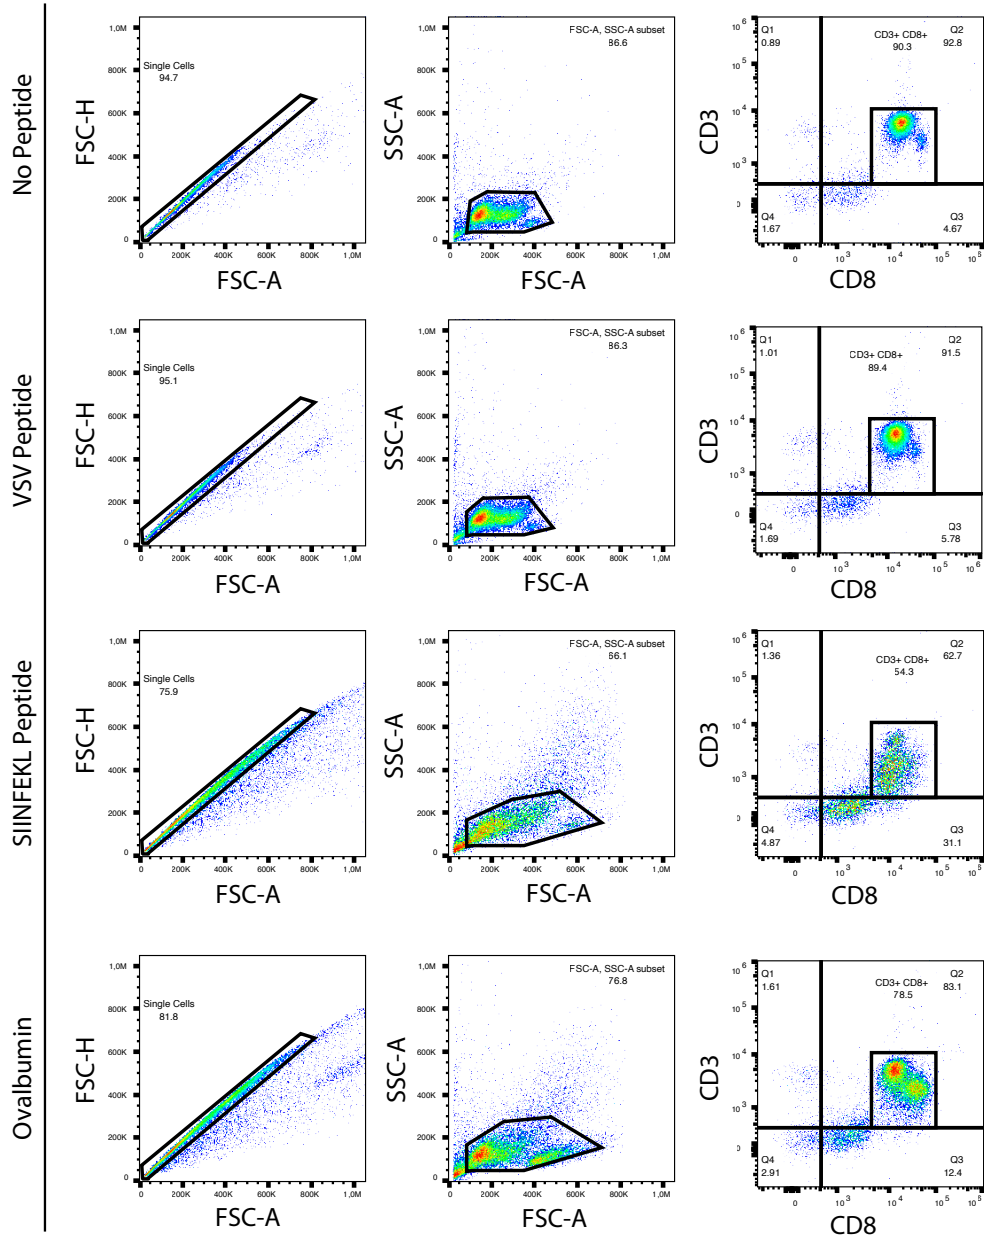

### **Supplementary Figure 2. Gating strategy for OT-I cells upon co-culture with WT pMBMECs**

Flow cytometry analysis of naïve OT-I cells after 24 hours of co-culture with TNF- $\alpha$ /IFN- $\gamma$  stimulated WT pMBMECs in the absence of antigen, or in the presence of VSV- or SIINFEKL peptide or full-length ovalbumin (OVA) protein. Single cells are selected first by using forward scatter height versus forward scatter area (FSC-H::FSC-A). CD3<sup>+</sup>CD8<sup>+</sup> cells were selected from the population of interest based on the side scatter area versus forward scatter area (SSC-A::FSC-A). OT-I CD8<sup>+</sup> T cells that are co-cultured with unpulsed or VSV-pulsed pMBMECs did not show an increase in their size and granulation, whereas SIINFEKL pulsed- or OVA-loaded pMBMECs induced a major increase in the size and granulation of the naïve OT-I CD8<sup>+</sup> T cells, indicating their activation. Moreover, activated OT-I CD8<sup>+</sup> T cells exhibited decreased CD3<sup>+</sup> cell surface expression.

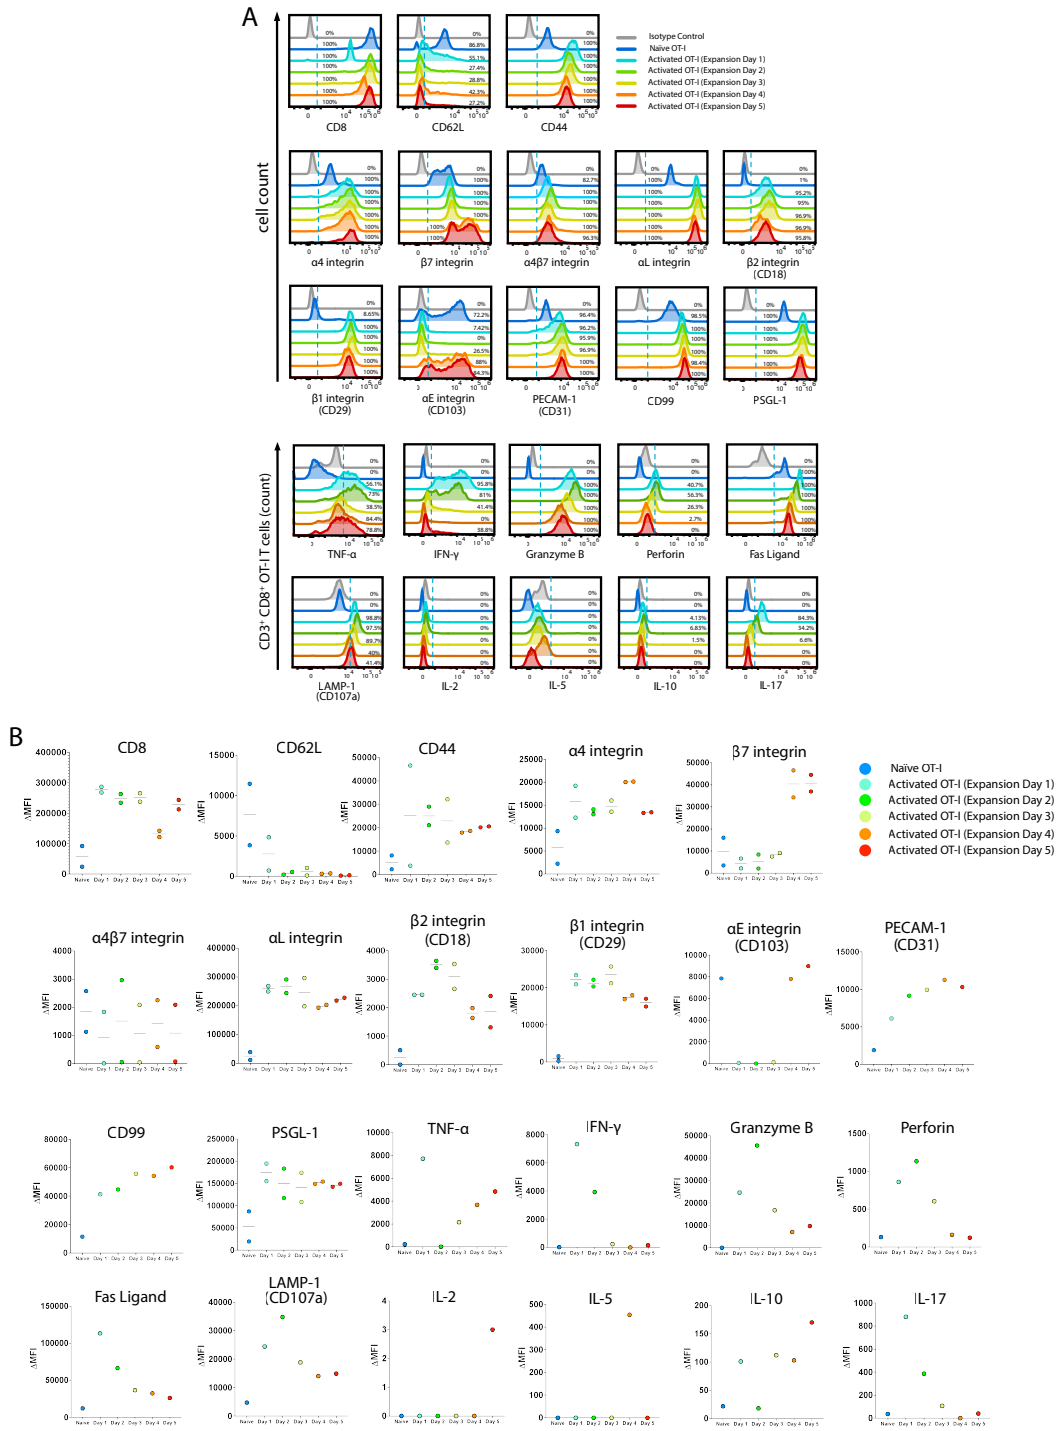

### Supplementary Figure 3. Phenotype of *in vitro* activated OT-I cells

Phenotype of *in vitro* activated and expanded OT-I cells by flow cytometry at different stages of their expansion. Naïve OT-I cells were used to compare the changes following the *in vitro* activation. **(A)** Single color flow cytometry staining of OT-I cells for activation and cell surface expression of T cell trafficking related markers: CD8, CD44, CD62L,  $\alpha 4$ -,  $\beta 7$ -,  $\alpha 4\beta 7$ -,  $\alpha L$ -,  $\beta 2$ -,  $\alpha E$ -,  $\beta 1$ -integrins, PECAM-1, CD99, PSGL-1, as well as for cytotoxicity related molecules: granzyme B, perforin, Fas ligand, LAMP-1 and cytokines TNF- $\alpha$ , IFN- $\gamma$ , IL-2, IL-5, IL-10, IL-17. Percentage of events above the dashed blue threshold is indicated. At the expansion day 1, OT-I cells are not fully activated based on the loss of cell surface staining for CD62L, while at the expansion day 4 and 5, OT-I T cells show the upregulation of  $\alpha E$ -integrin, indicating a tissue memory cell phenotype. The data is representative of 1 individual experiment for  $\alpha E$ -integrin, CD99, granzyme B, perforin, Fas ligand, LAMP-1, TNF- $\alpha$ , IFN- $\gamma$ , IL-2, IL-5, IL-10, IL-17 and of 2 individual experiments for CD8, CD44, CD62L,  $\alpha 4$ -,  $\beta 7$ -,  $\alpha 4\beta 7$ -,  $\alpha L$ -,  $\beta 2$ -,  $\beta 1$ -integrins and PSGL-1. **(B)** Median fluorescence intensity normalized to the isotype control in (A). Source data from B are provided as a Source Data file.

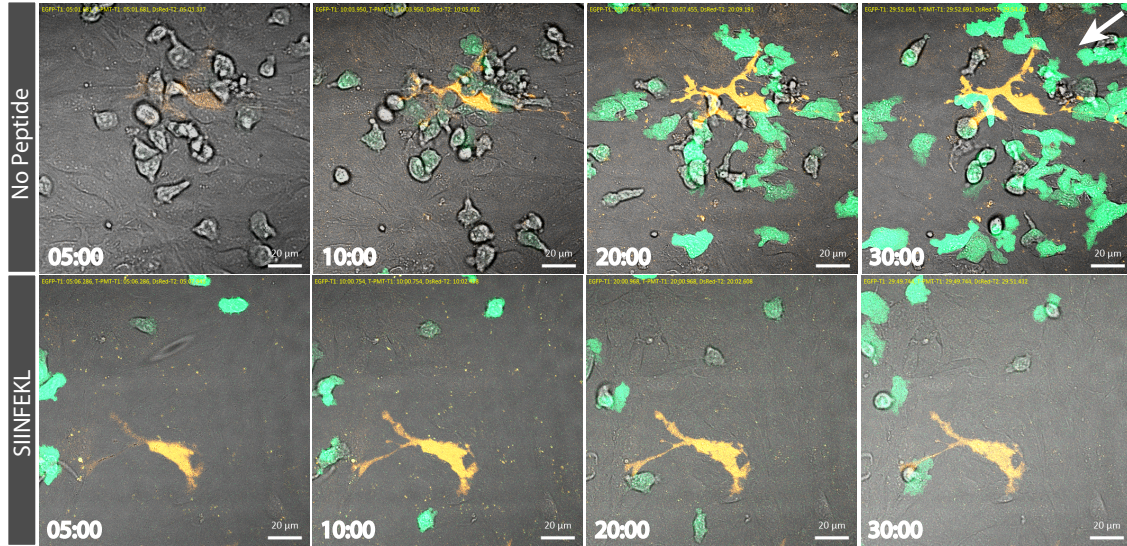

**Supplementary Figure 4. OT-I cells do not interact with pericytes in pMBMEC monolayers in an MHC class I restricted and Ag-dependent manner under physiological flow**

Interaction of CMFDA-labeled activated OT-I T cells with TNF- $\alpha$ /IFN- $\gamma$  stimulated pMBMECs from NG2-DsRed C57BL/6J mice pulsed or not with SIINFEKL peptide at different timepoints under physiological flow is shown.  $1 \times 10^6$  OT-I cells were superfused over the pMBMECs. Images are recorded for 30 minutes with LSM 800 confocal microscope (Carl Zeiss, Oberkochen, Germany). White arrow indicates the direction of the flow. OT-I T cells (green) do not specifically interact with the pericyte (orange) in the SIINFEKL-pulsed pMBMEC monolayer. Data are representative of 3 independent experiments. Scale bar = 20  $\mu$ m.

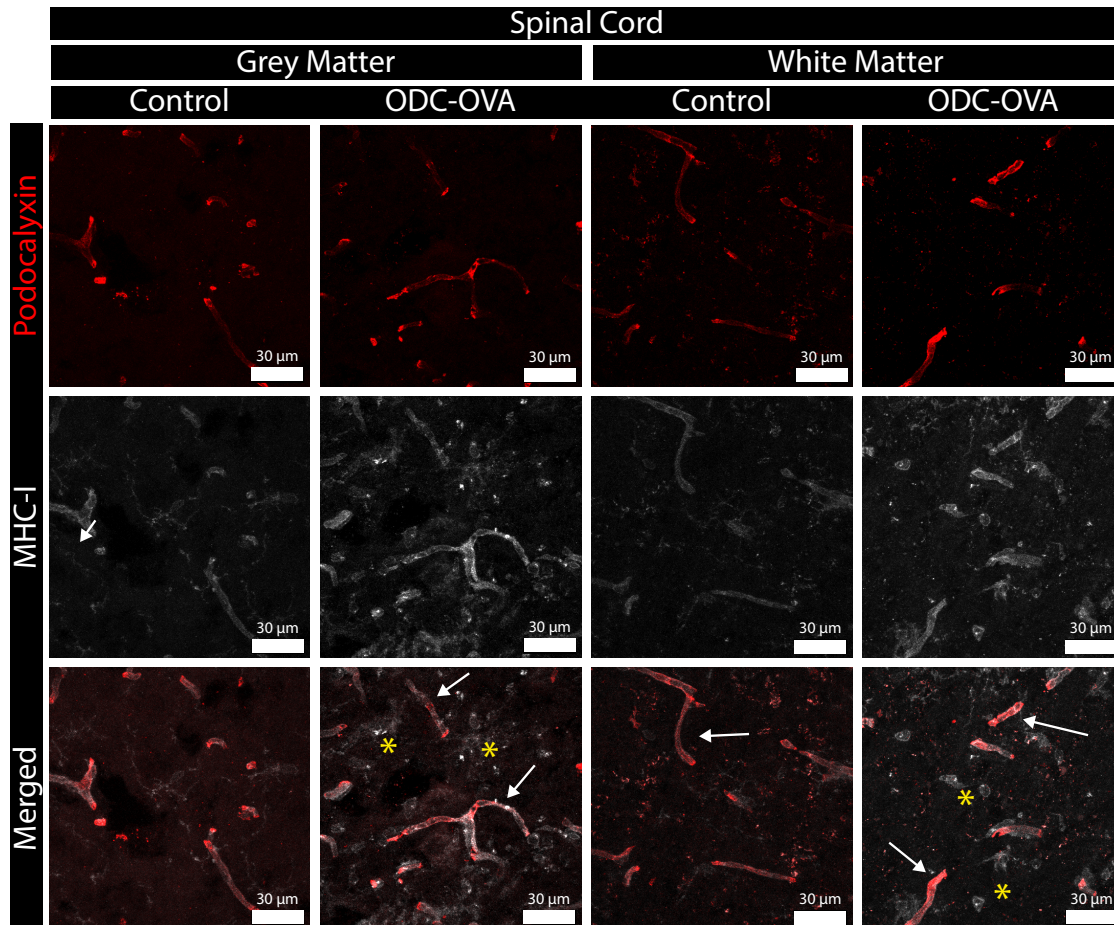

**Supplementary Figure 5. MHC-I colocalization with CNS vasculature in the spinal cord of ODC-OVA and WT C57BL/6J mice.**

Immunofluorescence staining of WT C57BL/6J and ODC-OVA mice spinal cords on day 7 after LCMV-OVA infection for MHC class I (grey), and endothelial cells (podocalyxin, red). Stainings in grey matter are displayed in the left panel and in the white matter on the right panel. White arrows show CNS vessels with a signal from both MHC class I and podocalyxin. Purple asterisks point to other CNS resident cells staining positive for MHC class I molecules on their surface. Data are representative of 5 different stainings from 3 mice from 3 independent experiments. Scale bar = 30  $\mu$ m

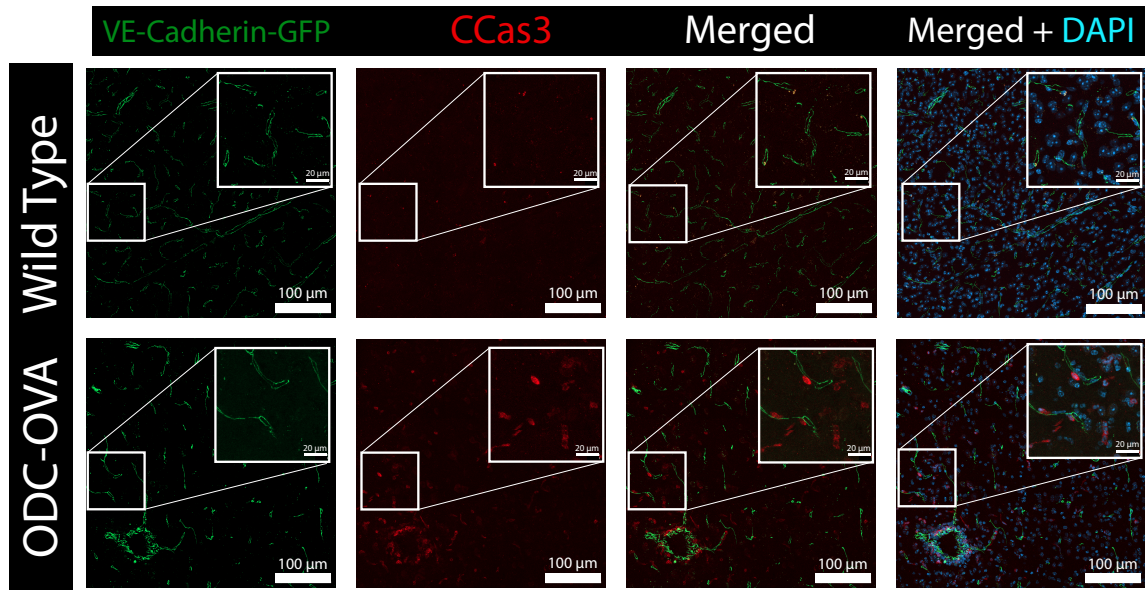

**Supplementary Figure 6. CD8<sup>+</sup> T cell driven neuroinflammation induces apoptotic events associated to the CNS vasculature**

Brains from VE-Cadherin-GFP (Wild Type) or VE-Cadherin-GFP ODC-OVA mice were harvested on day 7 after LCMV-OVA infection. 20 µm cryosections were stained for Cleaved Caspase 3 (CCas3) as a marker for apoptosis (red) and nuclei (DAPI, blue). Areas within white boxes are shown magnified on the top right allowing to depict the presence of CCas3 positive perivascular cells in VE-Cadherin-GFP ODC-OVA but not in VE-Cadherin-GFP control mice. Data is representative of 3 independent experiments. Scale bar = 100 µm.

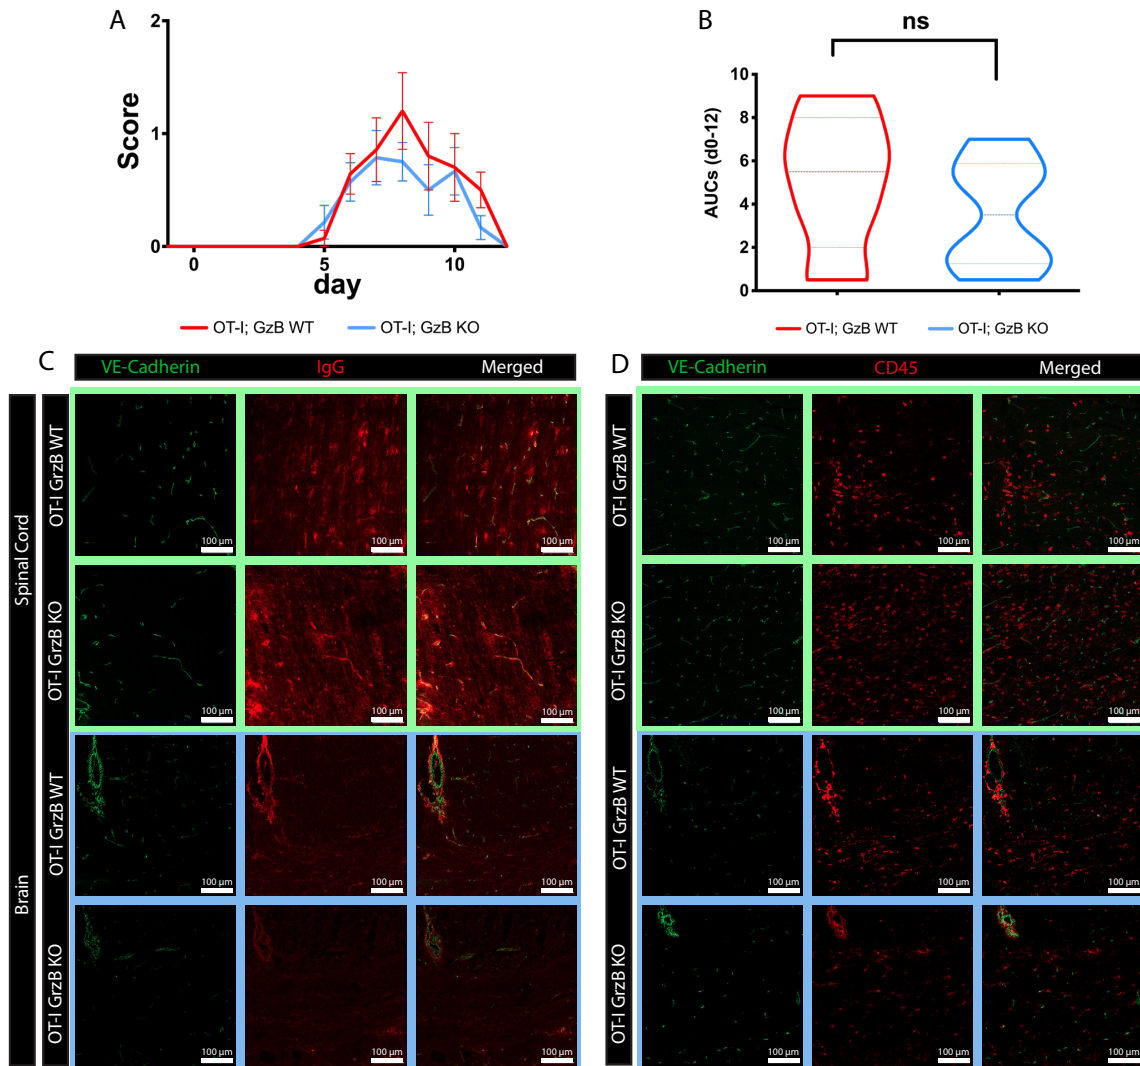

### Supplementary Figure 7. Granzyme B is dispensable for OT-I induced autoimmune neuroinflammation ODC-OVA mice

OT-I cell driven neuroinflammation was induced in VE-Cadherin-GFP ODC-OVA mice by transferring naïve OT-I or naïve OT-I GrB<sup>-/-</sup> cells one day prior to LCMV-OVA infection. **(A)** Clinical disease course of VE-Cadherin-GFP ODC-OVA mice after injection of OT-I GrB WT (red; n=7) or OT-I GrB KO cells (blue; n= 7) shown as mean ± SD. Data were analyzed using two-sided unpaired parametric T-test. **(B)** Overall clinical severity of VE-Cadherin-GFP ODC-OVA mice after injection of OT-I GrB WT (red, n=7) or OT-I GrB KO cells (blue; n=7) shown as area under the curve. Data were analyzed using two-sided unpaired parametric T-test. **(C, D)** Brains (blue box) and spinal cords (green box) from ODC-OVA mice in which autoimmune neuroinflammation was induced with either OT-I WT or OT-I GrB KO followed by LCMV-OVA infection were harvested on day 7 after infection. Immunofluorescence staining for IgG **(C)** or CD45 **(D)** (red) was performed on 20 µm thick cryosections. VE-cadherin-GFP visualizes vascular adherens junctions. Data are representative of 3 independent mice. Scale bar = 100 µm. Source data from A and B are provided as a Source Data file.

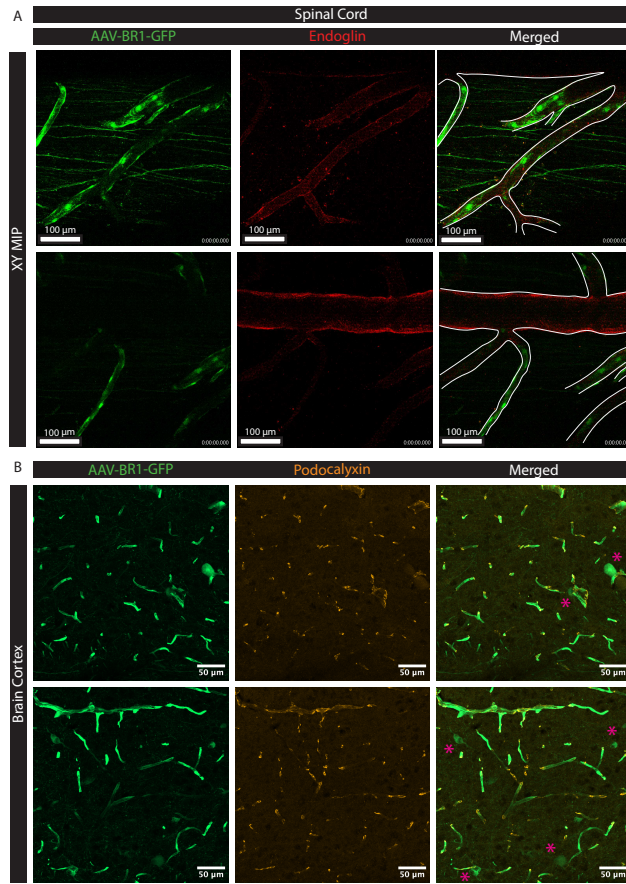

**Supplementary Figure 8. The AAV-BR1 vector shows a high tropism CNS microvascular endothelial cells.**

(A) Representative images of 2P-IVM imaging of the cervical spinal cord vessels (red) of an ODC-OVA TAP1<sup>fl/fl</sup> mouse on day 7 after LCMV-OVA injection. The mice were infected with AAV-BR1-GFP two weeks prior to the induction of autoimmune neuroinflammation. AAV-BR1-GFP infected cells are shown in green. The pictures are depicted as maximum intensity projection (MIP) of 100 µm thick Z-stacks. (B) Immunofluorescence staining for podocalyxin (orange) on 20 µm thick cryosection from brains isolated from an AAV-BR1-GFP infected ODC-OVA TAP1<sup>fl/fl</sup> mouse on day 7 after LCMV-OVA injection. AAV-BR1-GFP infected cells are shown in green. Magenta asterisks point to non-endothelial CNS resident cells infected with the AAV-BR1-GFP virus. Data are representative for 3 individual mice.

**Supplementary Table 1. Sequence of primers used for the qPCR analysis.**

| Official Gene Name                             | Entrez Gene ID | Accession Number | Primer Sequences                                    | Supplier   |
|------------------------------------------------|----------------|------------------|-----------------------------------------------------|------------|
| CD80 (mouse)                                   | 12519          | NM_009855        | Quantitech primer assay for mouse CD80, QT00129787  | Qiagen     |
| CD86 (mouse)                                   | 12524          | NM_019388        | Quantitech primer assay for mouse CD86, QT01055250  | Qiagen     |
| H2-K1 (mouse)                                  | 14972          | NM_001001892     | Quantitech primer assay for mouse H2K1, QT01743700  | Qiagen     |
| CD274 (PD-L1) (mouse)                          | 60533          | NM_021893        | Quantitech primer assay for mouse PD-L1, QT01743700 | Qiagen     |
| <b>β-actin (mouse)</b><br>(endogenous control) | 11461          | NM_007393        | Sense 5'- CGTGGGCCGCCCTAGGCACCA -3'                 | Eurogentec |
|                                                |                |                  | Anti sense 5'- TTGGCTTAGGGTTCAGGGGGG -3'            |            |

**Supplementary Table 2. List of antibodies used in this study.**

| <b>Flow Cytometry Antibodies</b>                              |                          |                |                      |                 |
|---------------------------------------------------------------|--------------------------|----------------|----------------------|-----------------|
| <b>Primary Antibodies</b>                                     | <b>Company</b>           | <b>CAT Nr.</b> | <b>Working Conc.</b> | <b>Clone</b>    |
| Rat monoclonal anti - Mouse CD25 - FITC                       | BioLegend                | 102006         | 5 µg/mL              | PC61            |
| Armenian Hamster monoclonal anti- Mouse CD3 - APC             | BioLegend                | 100312         | 5 µg/mL              | 145-2C11        |
| Armenian Hamster monoclonal anti - Mouse CD3 - BV605          | BioLegend                | 100351         | 8 µg/mL              | 145-2C11        |
| Rat monoclonal anti - Mouse CD44 - eFluor450                  | Thermo Fisher Scientific | 48-0441-80     | 5 µg/mL              | IM7             |
| Rat monoclonal anti - Mouse CD62L - PE                        | BioLegend                | 104408         | 0.2 µg/mL            | MEL-14          |
| Armenian Hamster monoclonal anti - Mouse CD69 - BV711         | BioLegend                | 104537         | 4 µg/mL              | H1-2F3          |
| Rat monoclonal anti - Mouse CD8 - PE-Cy7                      | BioLegend                | 100722         | 6 µg/mL              | 53-6.7          |
| Rat monoclonal - Mouse CD8 - PerCP                            | BioLegend                | 100732         | 2 µg/mL              | 53-6.7          |
| Mouse monoclonal anti - Mouse FasL - PE                       | BioLegend                | 106805         | 10 µg/mL             | Kay-10          |
| Mouse monoclonal anti - Mouse Granzyme B - FITC               | BioLegend                | 515403         | 10 µg/mL             | GB11            |
| Rat monoclonal anti - Mouse IFN-gamma - BV711                 | BioLegend                | 505836         | 10 µg/mL             | XMG1.2          |
| Rat monoclonal anti - Mouse LAMP-1 (CD107a) - PerCP-eFluor710 | Thermo Fisher Scientific | 46-1071-80     | 10 µg/mL             | eBio1D4B (1D4B) |
| Rat monoclonal anti - Mouse Perforin - APC                    | Thermo Fisher Scientific | 17-9392-80     | 10 µg/mL             | eBioOMAK-D      |
| Rat monoclonal - Mouse TNF-alpha - BV510                      | BD Biosciences           | 563386         | 5 µg/mL              | MP6-XT22        |
| Monoclonal Armenian Hamster IgG - BV605                       | BioLegend                | 400944         | 8 µg/mL              | HTK888          |
| Monoclonal Rat IgG2a - PE-Cy7                                 | Thermo Fisher Scientific | 25-4321-81     | 6 µg/mL              | eBR2a           |
| Monoclonal Rat IgG1 - BV510                                   | BD Biosciences           | 563039         | 5 µg/mL              | R3-34           |
| Monoclonal Rat IgG1 - BV711                                   | BioLegend                | 400441         | 4 µg/mL              | RTK2071         |
| Monoclonal Mouse IgG1 - FITC                                  | BD Biosciences           | 554679         | 10µg/mL              | MOPC-21         |
| Monoclonal Armenian Hamster IgG - APC                         | BioLegend                | 400911         | 10µg/mL              | HTK888          |
| Monoclonal Rat IgG2b - eFluor450                              | Thermo Fisher Scientific | 48-4031-80     | 5 µg/mL              | eB149/10H5      |
| Monoclonal Rat IgG2a - PE                                     | BioLegend                | 400508         | 0.2 µg/mL            | RTK2758         |
| Monoclonal Rat IgG2a - PerCP                                  | BioLegend                | 400530         | 2 µg/mL              | RTK2758         |
| Monoclonal Mouse IgG2b - PE                                   | BioLegend                | 400314         | 10 µg/mL             | MPC-11          |

|                                          |                          |            |          |         |
|------------------------------------------|--------------------------|------------|----------|---------|
| Monoclonal Armenian Hamster IgG - BV711  | BioLegend                | 400963     | 10µg/mL  | HTK888  |
| Monoclonal Rat IgG2a - PerCP - eFluor710 | Thermo Fisher Scientific | 46-4321-80 | 10 µg/mL | eBR2a   |
| Monoclonal Rat IgG2a - APC               | BioLegend                | 400512     | 5 µg/mL  | RTK2758 |

| Immunofluorescence Staining Antibodies        |                          |             |               |                |
|-----------------------------------------------|--------------------------|-------------|---------------|----------------|
| Primary Antibodies                            | Company                  | CAT Nr.     | Working Conc. |                |
| Rat monoclonal anti - Mouse CD8               | BioLegend                | 100702      | 10 µg/mL      | 53-6.7         |
| Armenian Hamster monoclonal anti - Mouse CD80 | BioLegend                | 104702      | 10 µg/mL      | 16-10A1        |
| Rat monoclonal anti - Mouse CD86              | BioLegend                | 105002      | 10 µg/mL      | GL-1           |
| Rat monoclonal anti - Mouse MHC class I       | BMA Biomedicals          | T-2105      | 20 µg/mL      | ER-HR52        |
| Rat monoclonal anti - Mouse PD-L1             | BioLegend                | 124302      | 2.0 µg/mL     | 10F.9G2        |
| Goat polyclonal anti - Mouse Podocalyxin      | R&D Systems              | AF1556      | 2.0 µg/mL     | Polyclonal     |
| Rabbit polyclonal anti - Mouse ZO-1           | Thermo Fisher Scientific | 61-7300     | 1.25 µg/mL    | Polyclonal     |
| Rat monoclonal anti - Rat IgG2a               | BioLegend                | 400501      | 10 µg/mL      | RTK2758        |
| Monoclonal Armenian Hamster IgG               | BioLegend                | 400901      | 10 µg/mL      | HTK888         |
| Monoclonal Rat IgG2b                          | BioLegend                | 400601      | 2.0 µg/mL     | RTK4530        |
| Monoclonal mouse IgG2a                        | abcam                    | ab18415     | 2.0 µg/mL     | MG2a-53        |
| Purified rat anti- mouse CD40 (3/23)          | BD Pharmingen            | 553788      | 10 µg/mL      | 3/23           |
| Polyclonal Rabbit anti-laminin                | DAKO                     | Z0097       | 10 µg/mL      | Polyclonal     |
| Rat anti-mouse CD45                           | In house                 | -           | 2 µg/mL       | M1/9.3.4. HL.2 |
| Rat anti- mouse VCAM-1                        | In house                 | -           | 20 µg/mL      | 2A11.12        |
| Rat anti- mouse ICAM-1                        | In house                 | -           | 6 µg/mL       | 25ZC7          |
| Rabbit anti-mouse cleaved caspase 3 (Asp175)  | Cell Signaling           | 9661S       | 10 µg/mL      | Polyclonal     |
| Polyclonal Rabbit IgG                         | R&D Systems              | AB-105-C    | 1.25 µg/mL    | Polyclonal     |
| Secondary Antibodies                          | Company                  | CAT Nr.     | Working Conc. |                |
| Donkey polyclonal anti - Rabbit IgG - AF488   | Thermo Fisher Scientific | A-21206     | 10 µg/mL      | Polyclonal     |
| Goat polyclonal - anti - Rat IgG - Cy3        | Jackson Immuno Research  | 112-165-143 | 2.5 µg/mL     | Polyclonal     |
| Goat polyclonal Biotin - anti - Hamster       | BioLegend                | 405501      | 10 µg/mL      | Polyclonal     |

|                                             |                                |             |           |            |
|---------------------------------------------|--------------------------------|-------------|-----------|------------|
| Goat polyclonal - anti - Rabbit IgG - AF647 | Thermo<br>Fisher<br>Scientific | A-21244     | 3 µg/mL   | Polyclonal |
| Donkey polyclonal - anti - Goat IgG - Cy3   | Jackson<br>Immuno<br>Research  | 705-165-147 | 5 µg/mL   | Polyclonal |
| Donkey polyclonal - anti-Rat IgG - AF488    | Thermo<br>Fisher<br>Scientific | A-21208     | 5 µg/mL   | Polyclonal |
| Donkey anti-rat Cy5                         | Jackson<br>Immuno<br>Research  | 712-175-153 | 5 µg/mL   | Polyclonal |
| Rabbit anti-Hamster Rhodamin                | Pierce                         | 31652       | 7.5 µg/mL | Polyclonal |
| donkey anti-goat AF647                      | Jackson<br>Immuno<br>Research  | 705-605-003 | 7.5 µg/mL | Polyclonal |
| Streptavidin Cy3                            | BioLegend                      | 405215      | 10 µg/mL  | -          |
